# Supplementary material for: Pneumococcal population genomics changes during the early time period of conjugate vaccine uptake in southern India
Source: PubMed Central journal article supplement (PMC10926699; doi:10.1099/mgen.0.001191), 2024-02-05

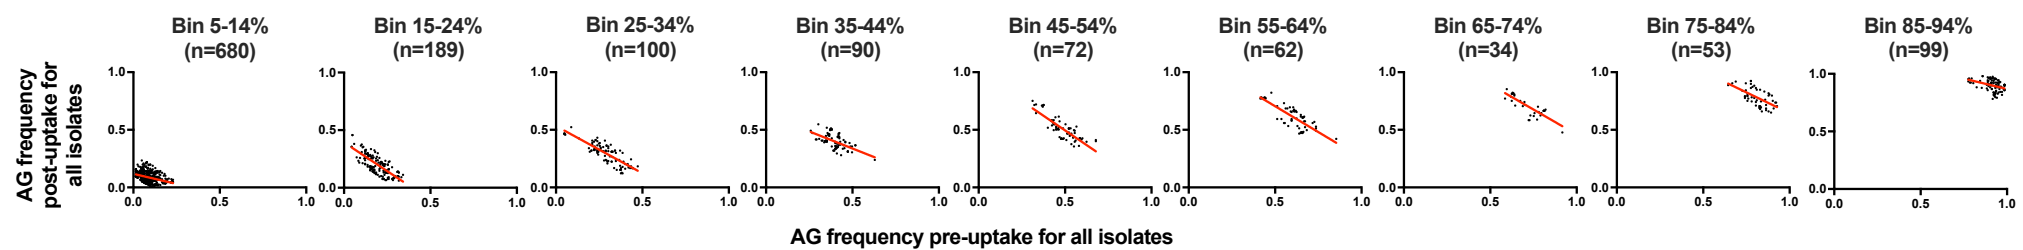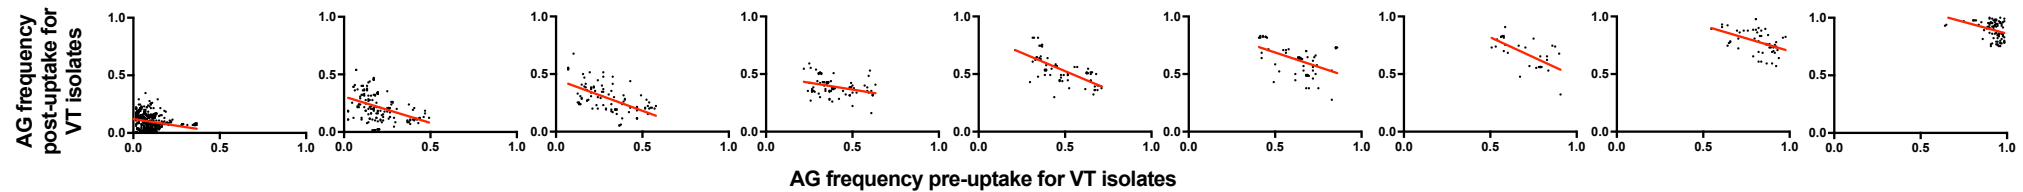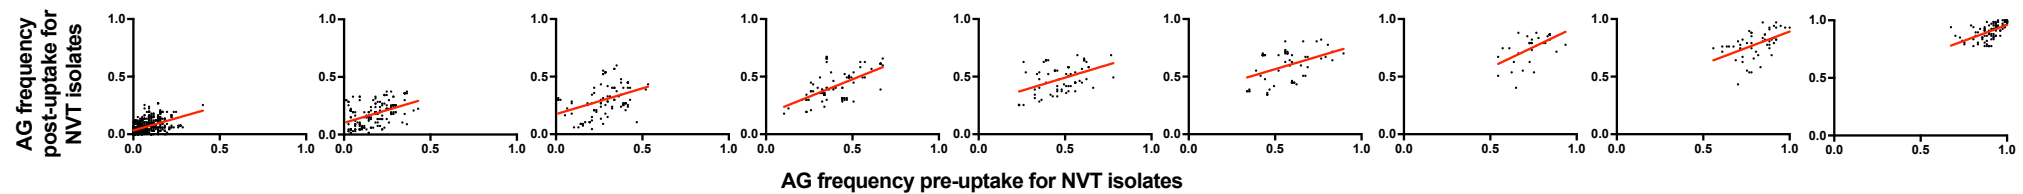

Supplement: mgen-10-1191-s001.pdf [file mgen-10-1191-s001.pdf]
